## CORRECTION

# Correction: Specific Changes of Exocarp and Mesocarp Occurring during Softening Differently Affect Firmness in Melting (MF) and Non Melting Flesh (NMF) Fruits

The *PLOS ONE* Staff

## Notice of Republication

Figs 1–7 were published in error. The error was corrected in the HTML and PDF versions of this article on January 7, 2016, and the corrected figures are available in the supporting information of this article. The publisher apologizes for the errors. Please download this article again to view the correct version.

## Supporting Information

**S1 Zip. Corrected Figs 1–7.**  
(ZIP)

## Reference

1. Onelli E, Ghiani A, Gentili R, Serra S, Musacchi S, Citterio S (2015) Specific Changes of Exocarp and Mesocarp Occurring during Softening Differently Affect Firmness in Melting (MF) and Non Melting Flesh (NMF) Fruits. *PLoS ONE* 10(12): e0145341. doi: [10.1371/journal.pone.0145341](https://doi.org/10.1371/journal.pone.0145341) PMID: [26709823](https://pubmed.ncbi.nlm.nih.gov/26709823/)

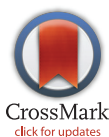

## OPEN ACCESS

**Citation:** The *PLOS ONE* Staff (2016) Correction: Specific Changes of Exocarp and Mesocarp Occurring during Softening Differently Affect Firmness in Melting (MF) and Non Melting Flesh (NMF) Fruits. *PLoS ONE* 11(1): e0147893. doi:10.1371/journal.pone.0147893

**Published:** January 22, 2016

**Copyright:** © 2016 The PLOS ONE Staff. This is an open access article distributed under the terms of the [Creative Commons Attribution License](https://creativecommons.org/licenses/by/4.0/), which permits unrestricted use, distribution, and reproduction in any medium, provided the original author and source are credited.
